# Supplementary figures and images for: HB-EGF Ameliorates Oxidative Stress-Mediated Uterine Decidualization Damage
Source: Hindawi journal article supplement (doi:10.1155/2019/6170936), 2019-12-02

**Vehicle+EP**

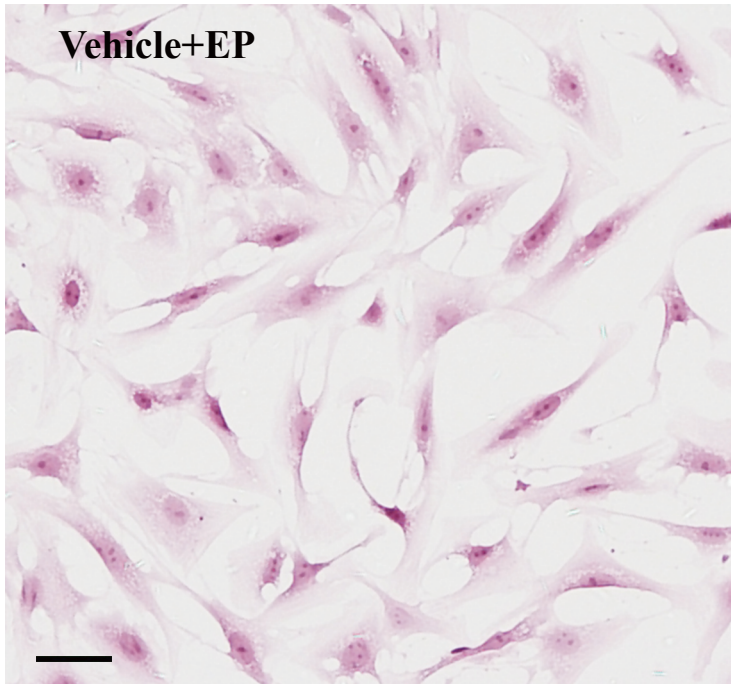

**rHB-EGF+EP**

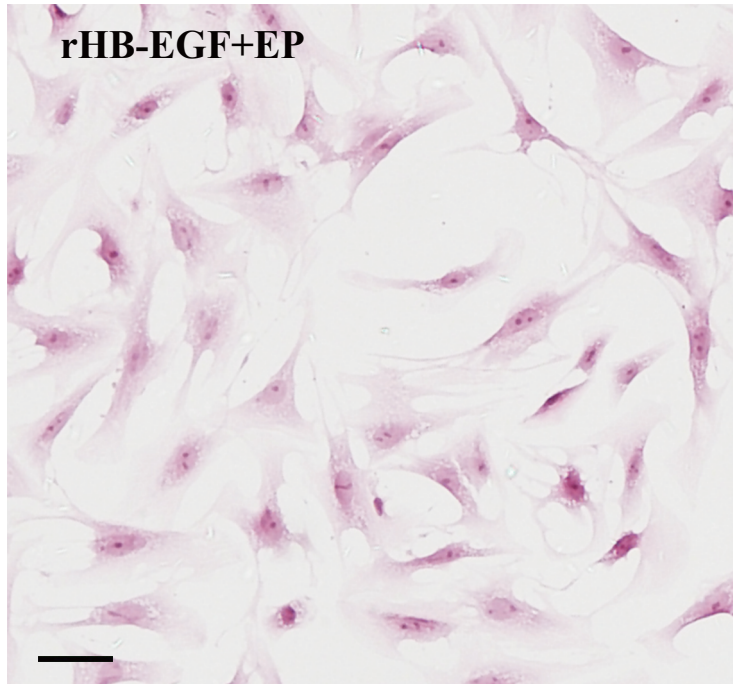

Supplement: f1 [file 6170936.f1.ai]

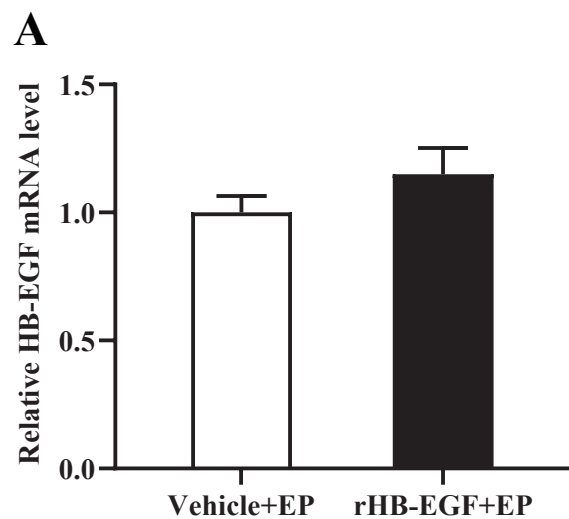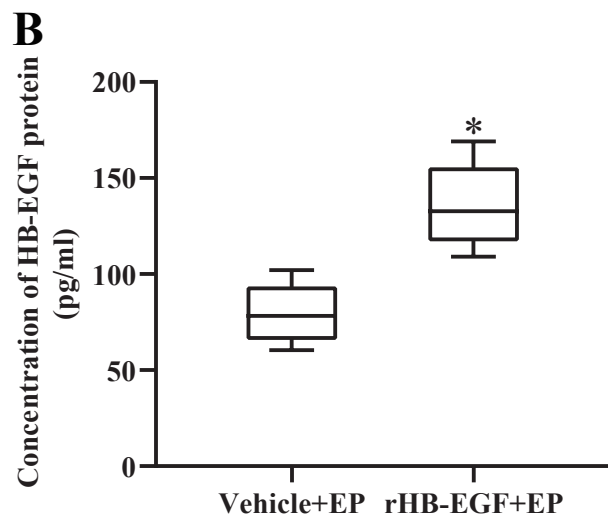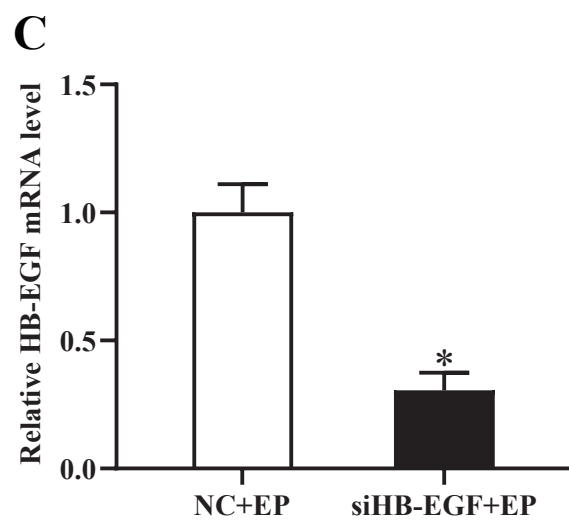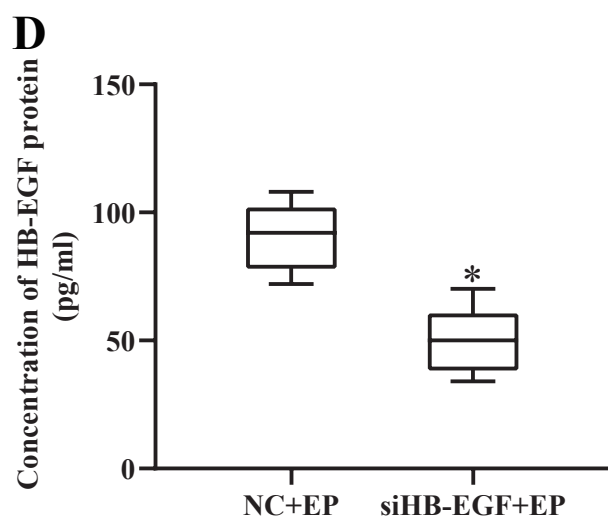

Supplement: f2 [file 6170936.f2.ai]
